# Supplementary material for: β-(Z)-Selective alkyne hydrosilylation by a N,O-functionalized NHC-based rhodium(i) catalyst
Source: Royal Society of Chemistry journal article supplement (doi:10.1039/d3dt01911j), 2023-01-01
Supplement: d3dt01911j2.pdf [file d3dt01911j2.pdf]

## Supplementary Information

### $\beta$ -(Z)-Selective Alkyne Hydrosilylation by a N,O-Functionalized NHC-based Rhodium(I) Catalyst

Miguel González-Lainez, M. Victoria Jiménez, \* Vincenzo Passarelli, and Jesús J. Pérez-Torrente\*

*Departamento de Química Inorgánica – Instituto de Síntesis Química y Catálisis Homogénea-ISQCH, Universidad de Zaragoza – CSIC, C/ Pedro Cerbuna 12, 50009 Zaragoza, Spain*

#### Contents

|                                                                                                                                                        |     |
|--------------------------------------------------------------------------------------------------------------------------------------------------------|-----|
| 1.- NMR spectra of rhodium(I) organometallic compounds <b>2-6</b> .                                                                                    | S2  |
| 2.- ATR-IR spectra of carbonyl compounds <b>4-6</b> .                                                                                                  | S14 |
| 3.- Hydrosilylation of phenylacetylene derivatives with HSiMe <sub>2</sub> Ph catalyzed by <b>6</b> .                                                  | S16 |
| 4.- Hydrosilylation of terminal alkynes with HSiMe <sub>2</sub> Ph catalyzed by <b>6</b> at different reaction times.                                  | S17 |
| 5.- Isomerization $\beta$ -(Z)→ $\beta$ -(E) in the hydrosilylation of phenylacetylene with HSiMe <sub>2</sub> Ph catalyzed by <b>6</b> .              | S19 |
| 6.- Reaction of <b>6</b> with 20 eq. of HSi(OEt) <sub>3</sub>                                                                                          | S19 |
| 7.- Determination of activation parameters for the hydrosilylation of 1-hexyne with HSiMe <sub>2</sub> Ph catalyzed by <b>6</b> in CDCl <sub>3</sub> . | S20 |
| 8.- Scan of the Si···O coordinates en route from <b>II</b> → <b>III</b> .                                                                              | S23 |

## 1.- NMR spectra of rhodium(I) organometallic compounds 2-6.

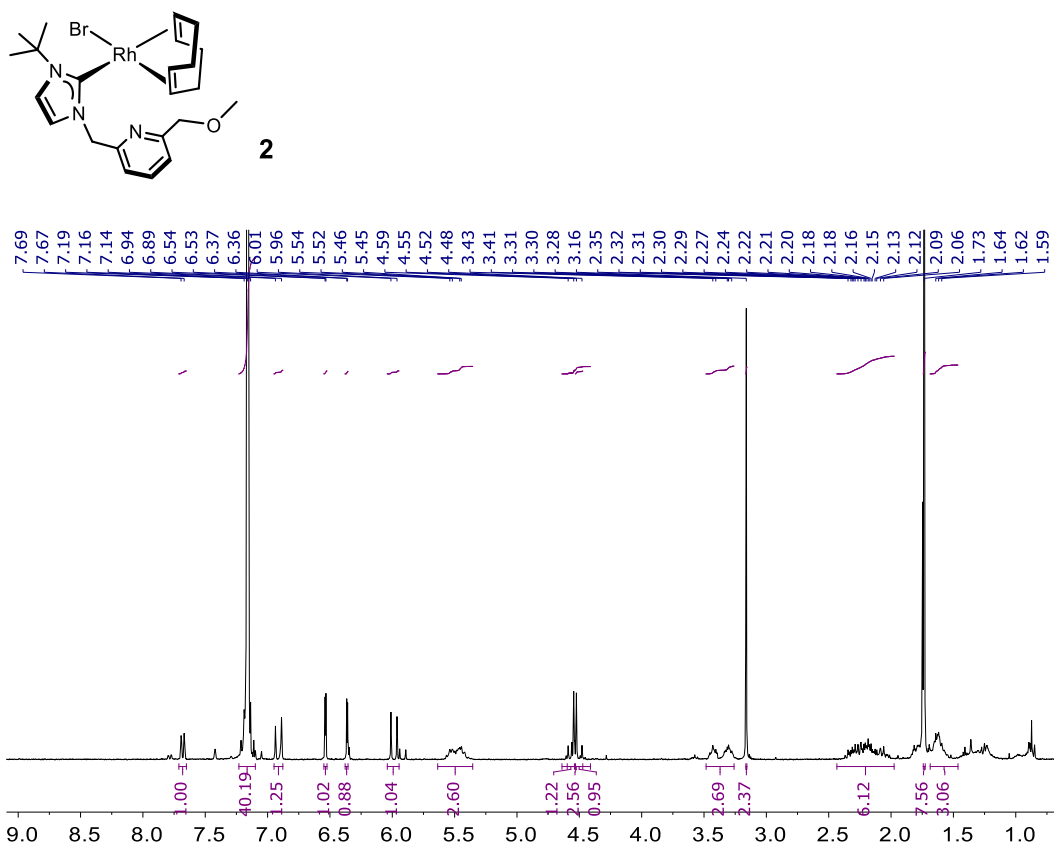

**Figure S1.**  $^1\text{H}$  NMR ( $\text{C}_6\text{D}_6$ ) spectrum of  $[\text{RhBr}(\text{cod})(\kappa\text{C}-t\text{BuImCH}_2\text{PyCH}_2\text{OMe})]$  (**2**).

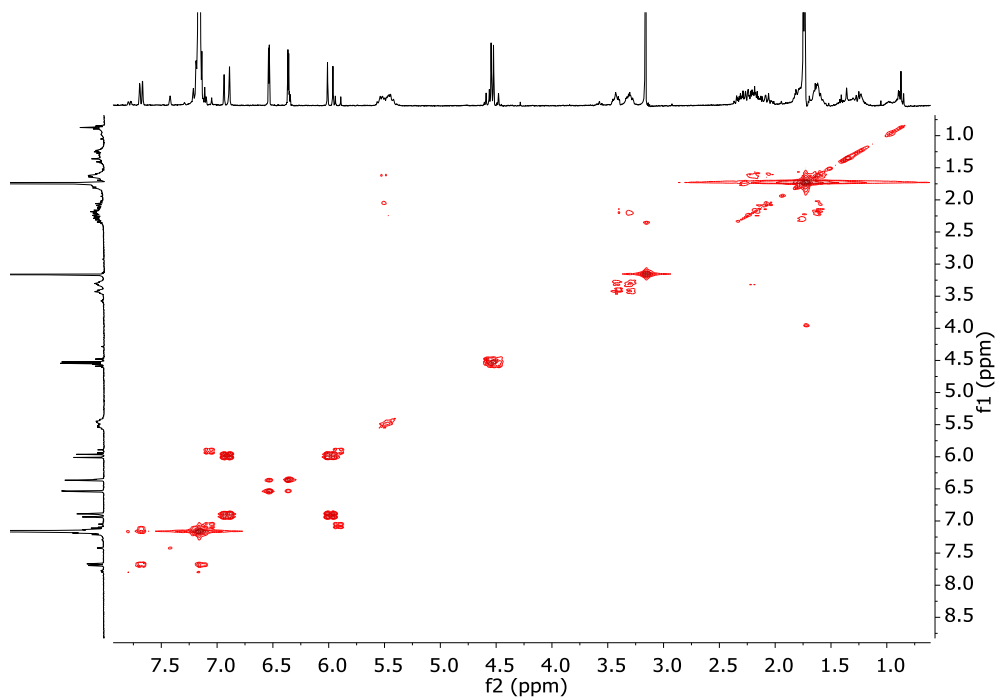

**Figure S2.**  $^1\text{H}$ - $^1\text{H}$  COSY ( $\text{C}_6\text{D}_6$ ) of  $[\text{RhBr}(\text{cod})(\kappa\text{C}-t\text{BuImCH}_2\text{PyCH}_2\text{OMe})]$  (**2**).

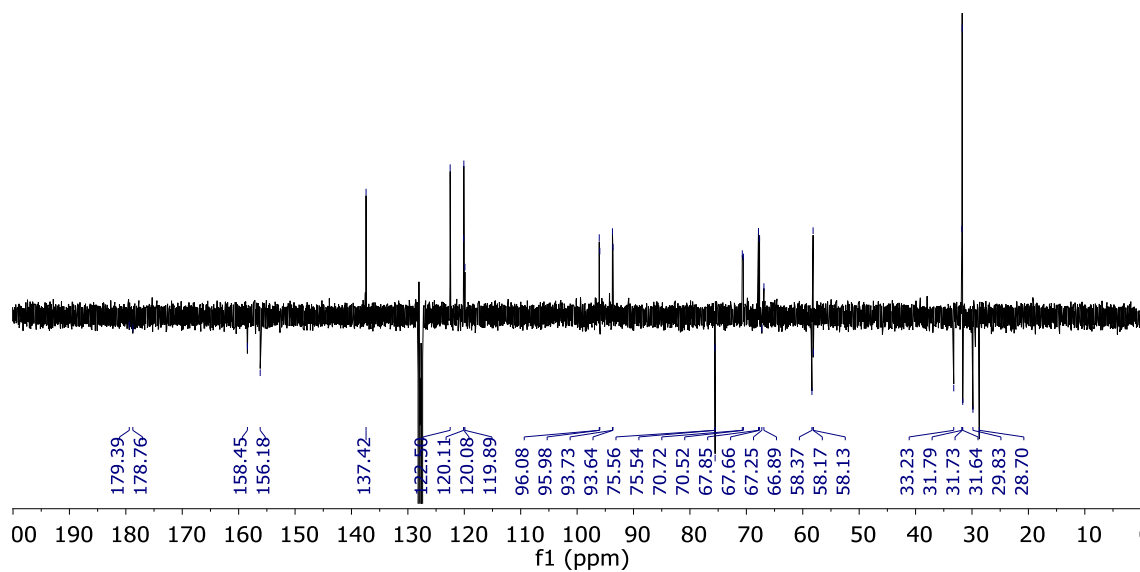

**Figure S3.**  $^{13}\text{C}\{^1\text{H}\}$  NMR ( $\text{C}_6\text{D}_6$ ) APT of  $[\text{RhBr}(\text{cod})(\kappa\text{C}^{-1}\text{BuImCH}_2\text{PyCH}_2\text{OMe})]$  (**2**).

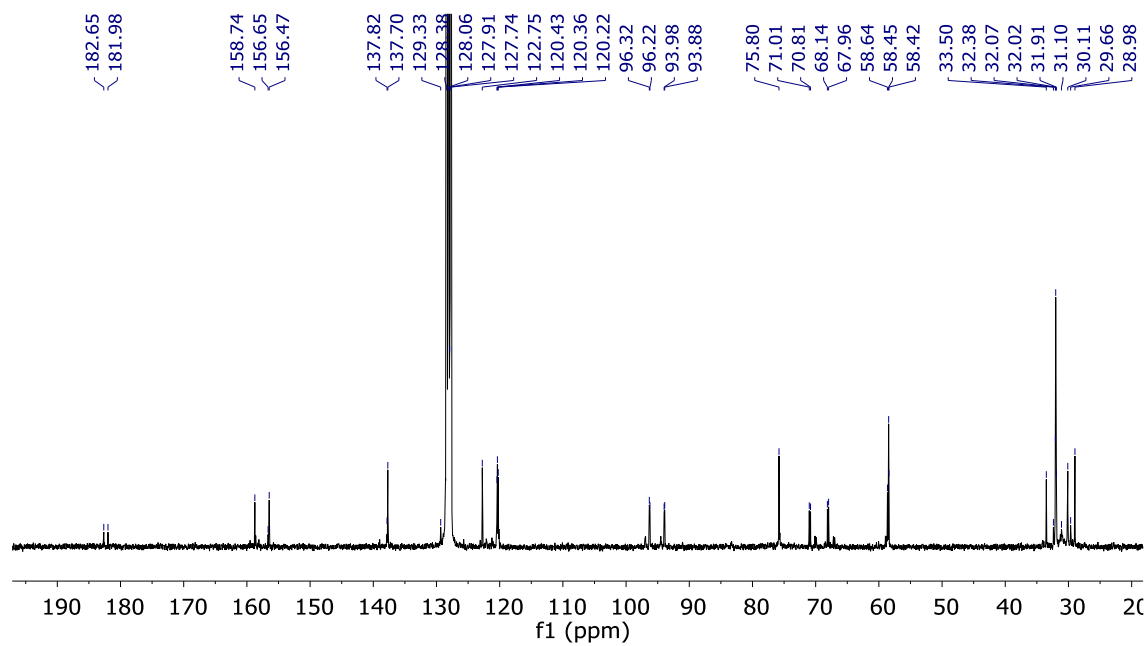

**Figure S4.**  $^{13}\text{C}\{^1\text{H}\}$  NMR ( $\text{C}_6\text{D}_6$ ) of  $[\text{RhBr}(\text{cod})(\kappa\text{C}^{-1}\text{BuImCH}_2\text{PyCH}_2\text{OMe})]$  (**2**).

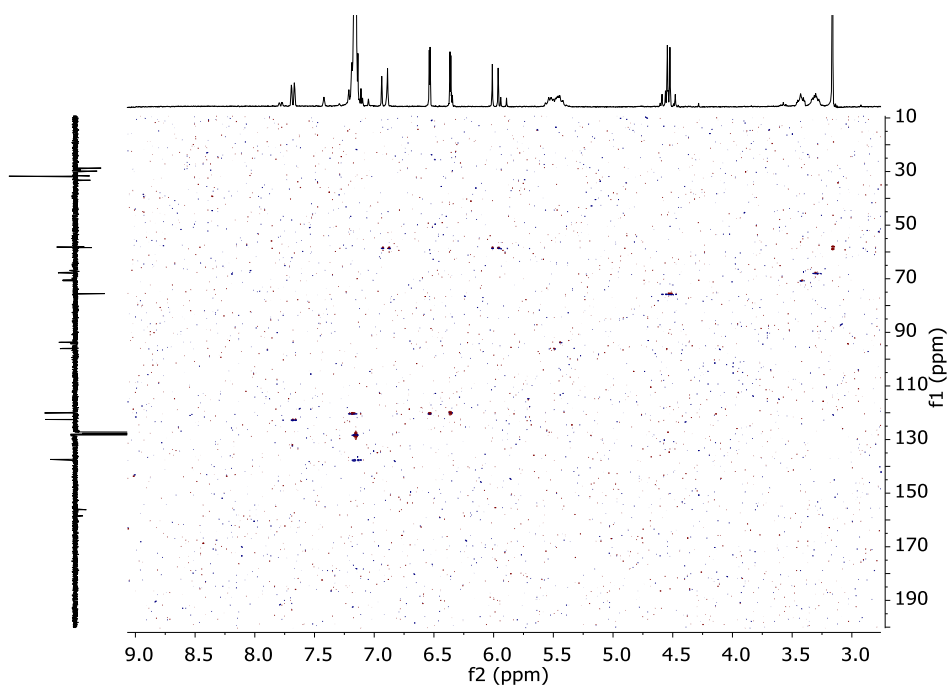

**Figure S5.**  $^1\text{H}$ - $^{13}\text{C}$  HSQC ( $\text{C}_6\text{D}_6$ ) of  $[\text{RhBr}(\text{cod})(\kappa\text{C}\text{-}^1\text{BuImCH}_2\text{PyCH}_2\text{OMe})]$  (**2**).

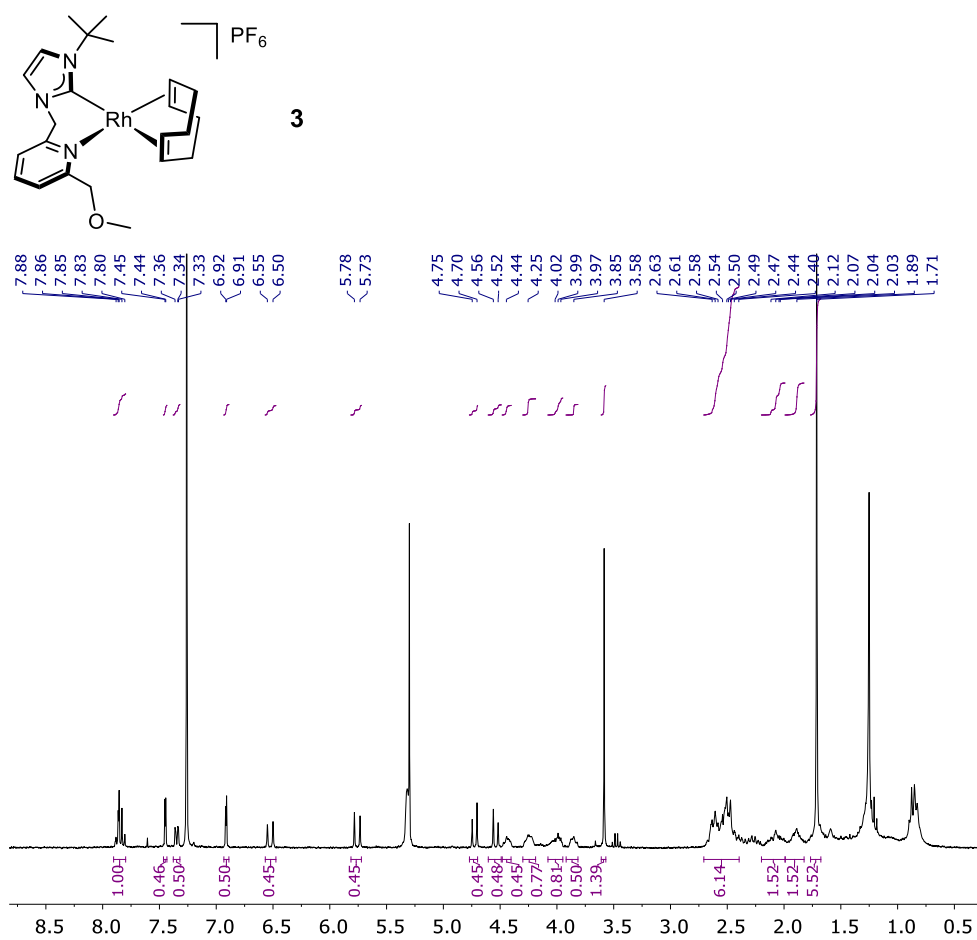

**Figure S6.**  $^1\text{H}$  NMR ( $\text{CDCl}_3$ ) spectrum of  $[\text{Rh}(\text{cod})(\kappa^2\text{C},\text{N}\text{-}^1\text{BuImCH}_2\text{PyCH}_2\text{OMe})]\text{PF}_6$  (**3**).

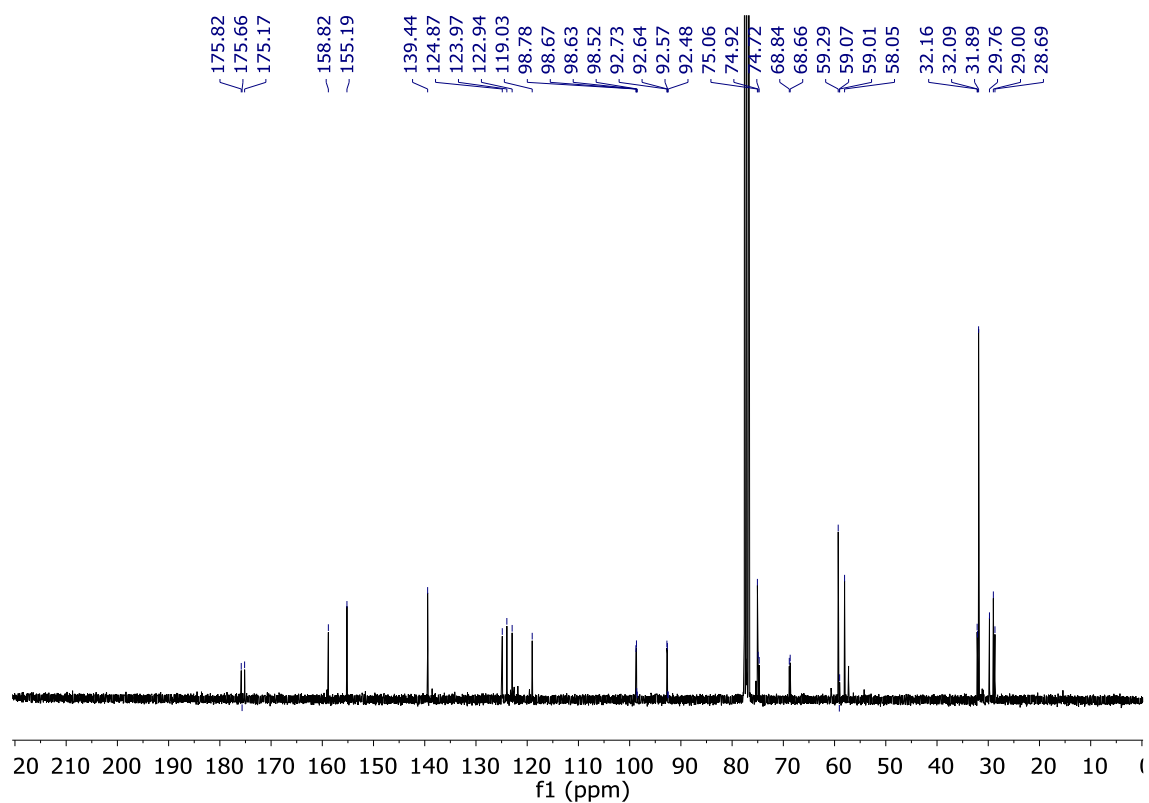

**Figure S7.**  $^{13}\text{C}\{^1\text{H}\}$  NMR ( $\text{C}_6\text{D}_6$ ) of  $[\text{Rh}(\text{cod})(\kappa^2\text{C},\text{N}-t\text{BuImCH}_2\text{PyCH}_2\text{OMe})]\text{PF}_6$  (**3**).

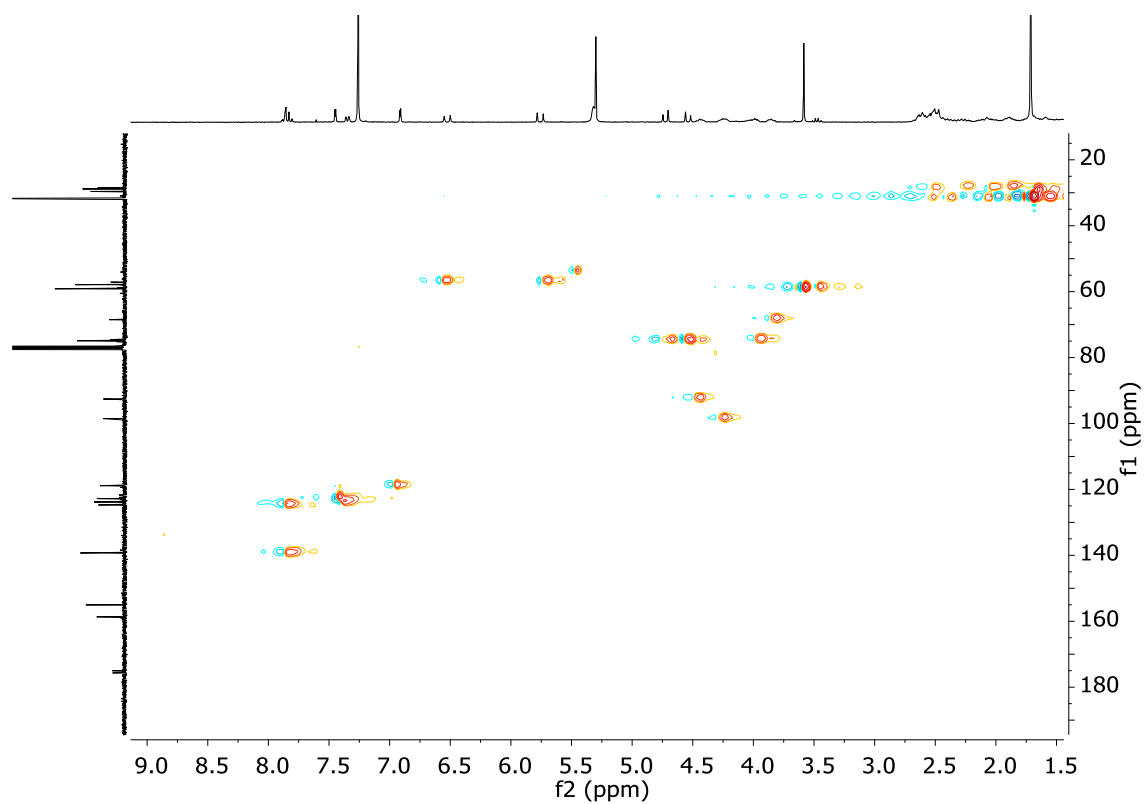

**Figure S8.**  $^1\text{H}-^{13}\text{C}$  HSQC ( $\text{C}_6\text{D}_6$ ) of  $[\text{Rh}(\text{cod})(\kappa^2\text{C},\text{N}-t\text{BuImCH}_2\text{PyCH}_2\text{OMe})]\text{PF}_6$  (**3**).

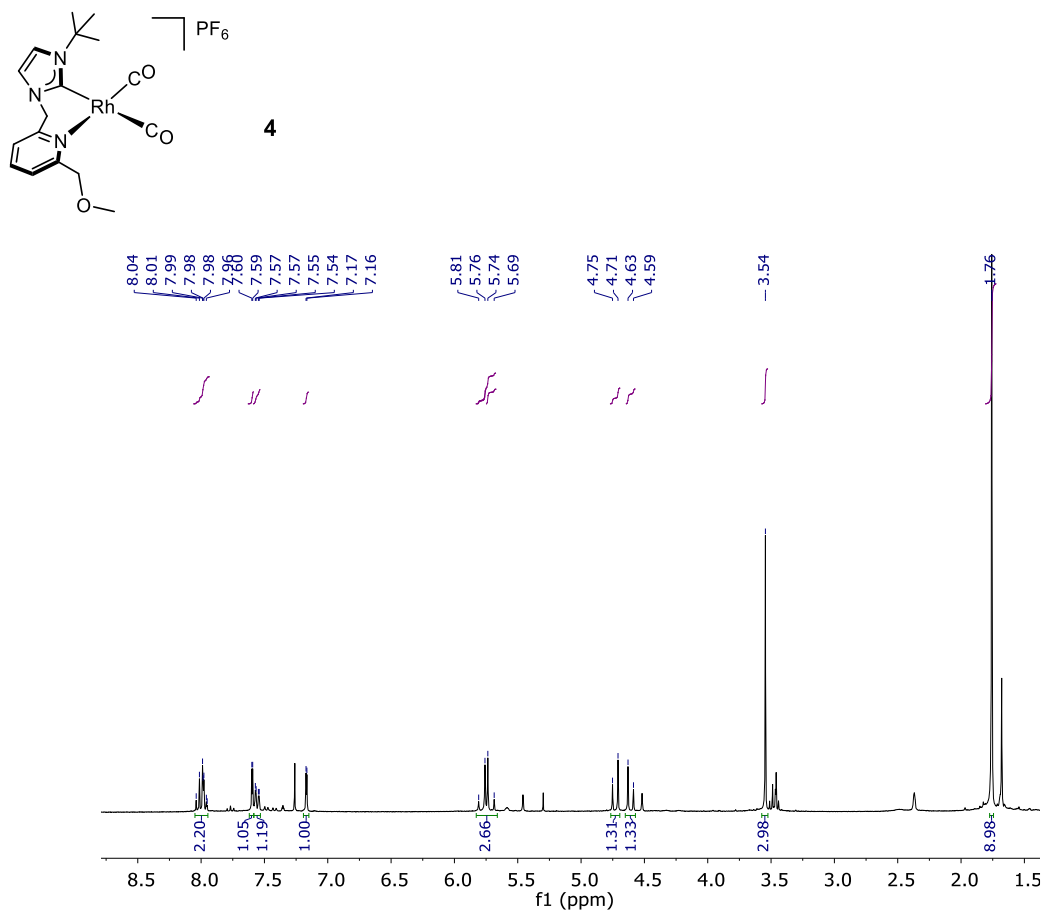

**Figure S9.**  $^1\text{H}$  NMR (CDCl<sub>3</sub>) spectrum of  $[\text{Rh}(\text{CO})_2(\kappa^2\text{C}, N\text{-}^t\text{BuImCH}_2\text{PyCH}_2\text{OMe})]\text{PF}_6$  (**4**).

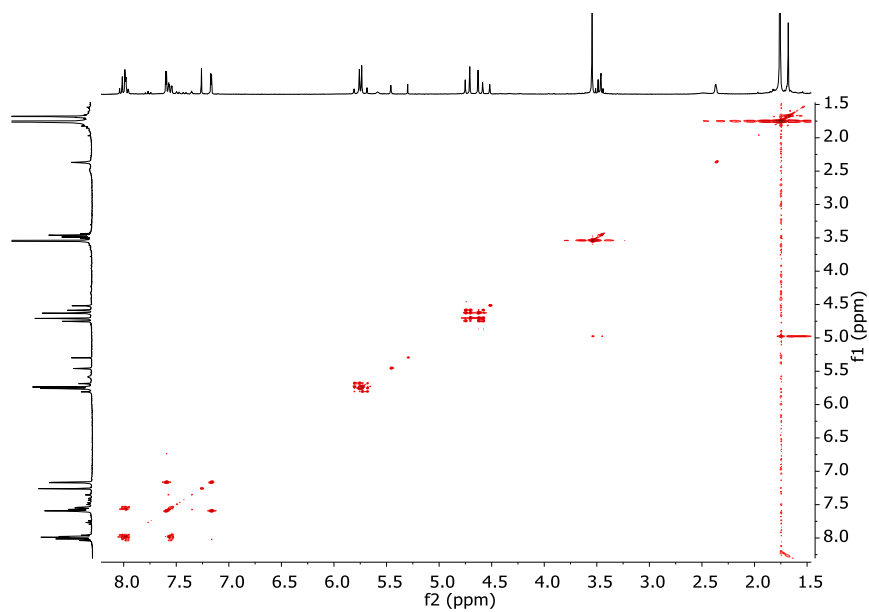

**Figure S10.**  $^1\text{H}$ - $^1\text{H}$  COSY NMR (CDCl<sub>3</sub>) of  $[\text{Rh}(\text{CO})_2(\kappa^2\text{C}, N\text{-}^t\text{BuImCH}_2\text{PyCH}_2\text{OMe})]\text{PF}_6$  (**4**).

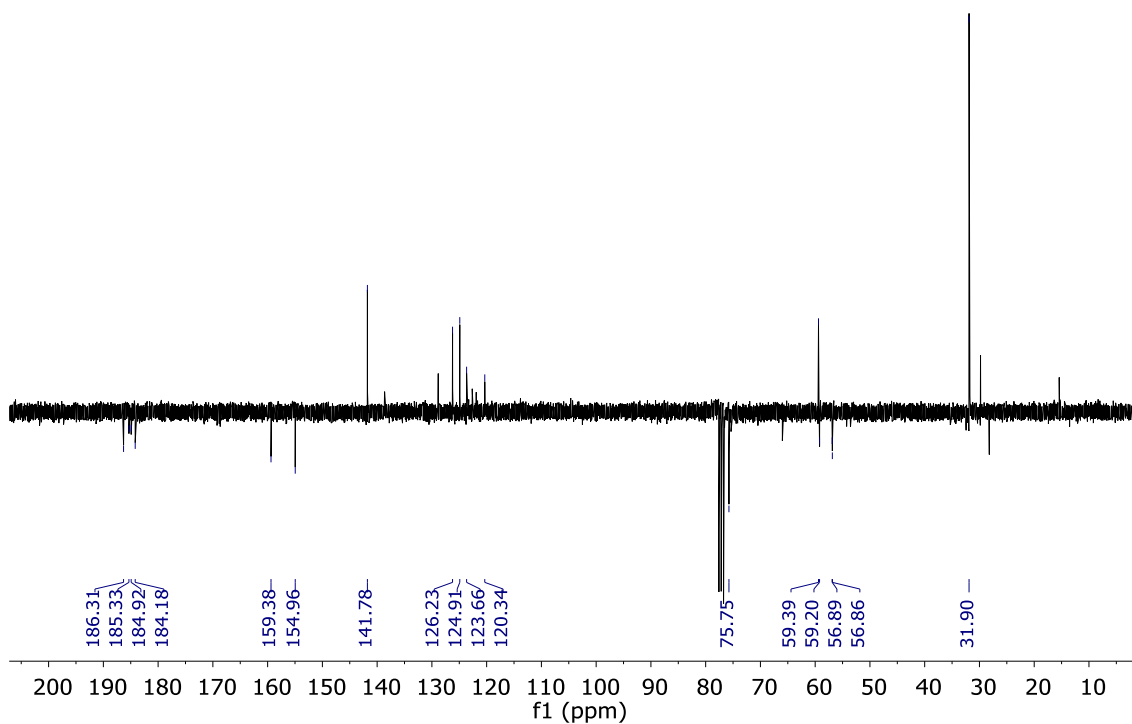

**Figure S11.**  $^{13}\text{C}\{^1\text{H}\}$ -APT NMR ( $\text{CDCl}_3$ ) spectrum of  $[\text{Rh}(\text{CO})_2(\kappa^2\text{C},\text{N}-\text{tBuImCH}_2\text{PyCH}_2\text{OMe})]\text{PF}_6$  (**4**).

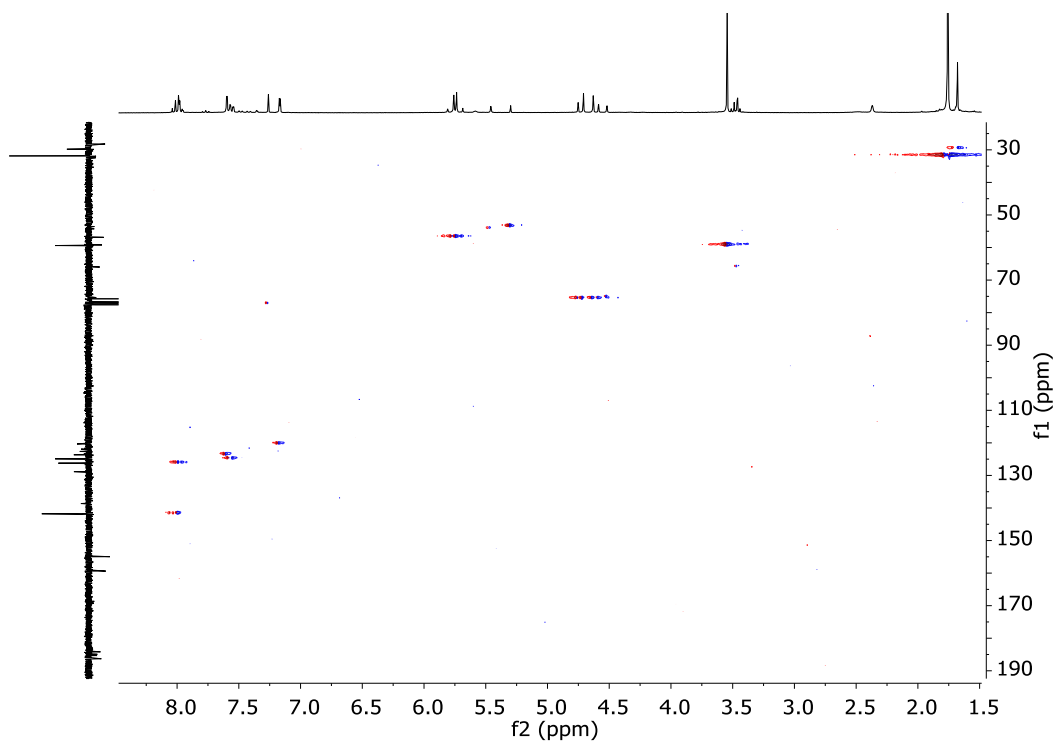

**Figure S12.**  $^1\text{H}-^{13}\text{C}$  HSQC NMR ( $\text{CDCl}_3$ ) of  $[\text{Rh}(\text{CO})_2(\kappa^2\text{C},\text{N}-\text{tBuImCH}_2\text{PyCH}_2\text{OMe})]\text{PF}_6$  (**4**).

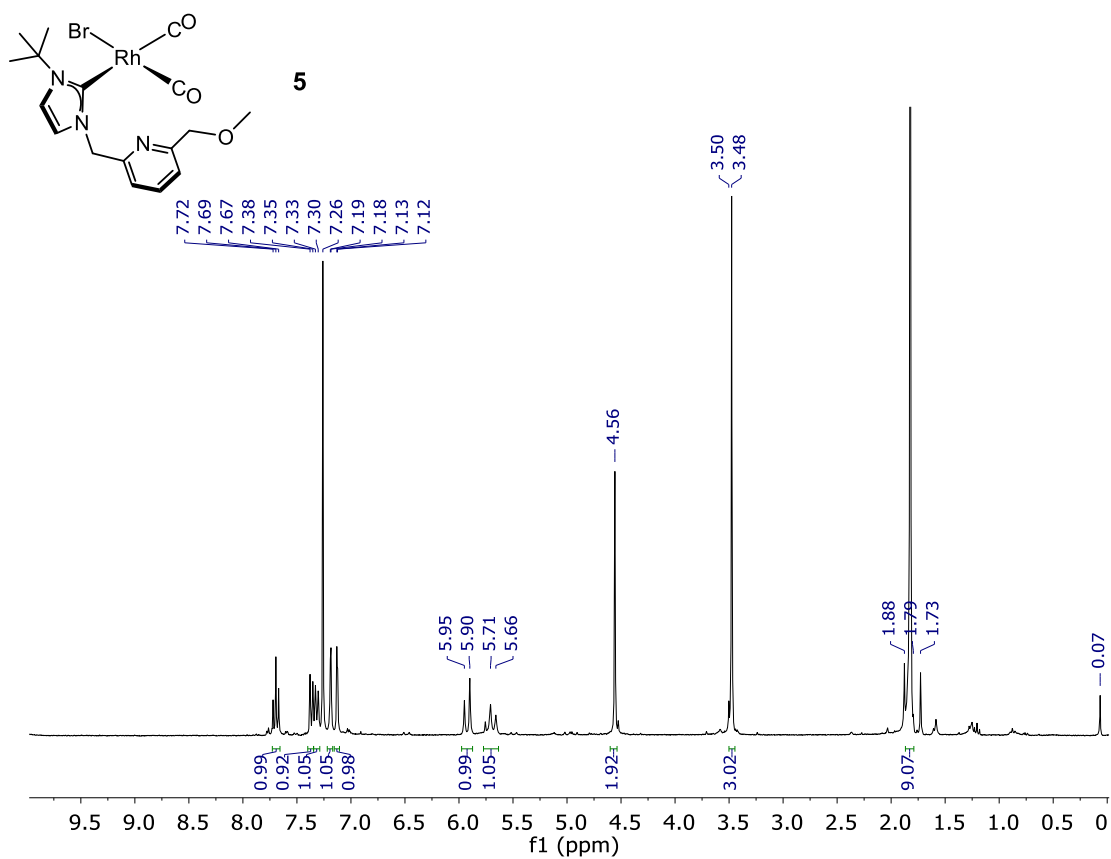

**Figure S13.**  $^1\text{H}$  NMR ( $\text{CDCl}_3$ ) spectrum of  $[\text{RhBr}(\text{CO})_2(\kappa\text{C}-^t\text{BuImCH}_2\text{PyCH}_2\text{OMe})]$  (**5**).

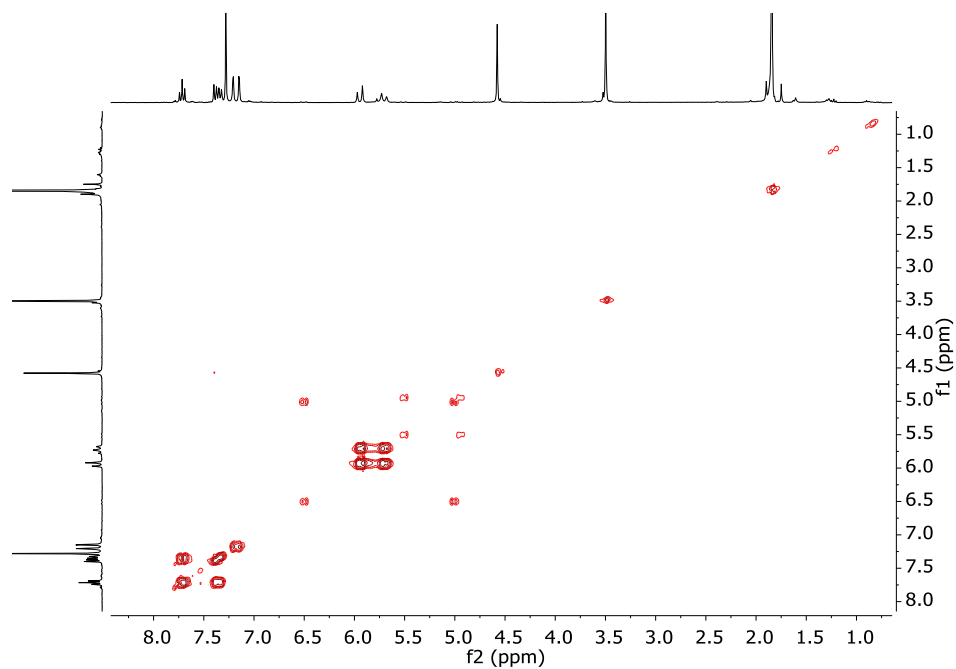

**Figure S14.**  $^1\text{H}-^1\text{H}$  COSY NMR ( $\text{CDCl}_3$ ) of  $[\text{RhBr}(\text{CO})_2(\kappa\text{C}-^t\text{BuImCH}_2\text{PyCH}_2\text{OMe})]$  (**5**).



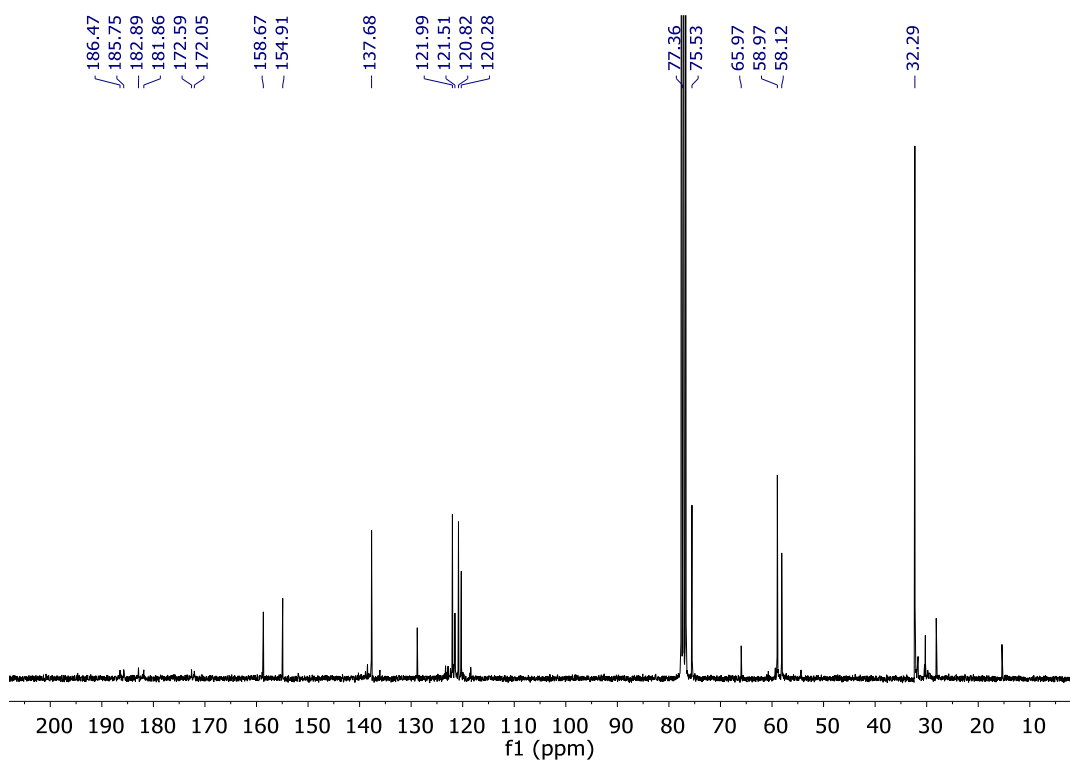

**Figure S15.**  $^{13}\text{C}\{^1\text{H}\}$  NMR ( $\text{CDCl}_3$ ) of  $[\text{RhBr}(\text{CO})_2(\kappa\text{C-}^t\text{BuImCH}_2\text{PyCH}_2\text{OMe})]$  (**5**).

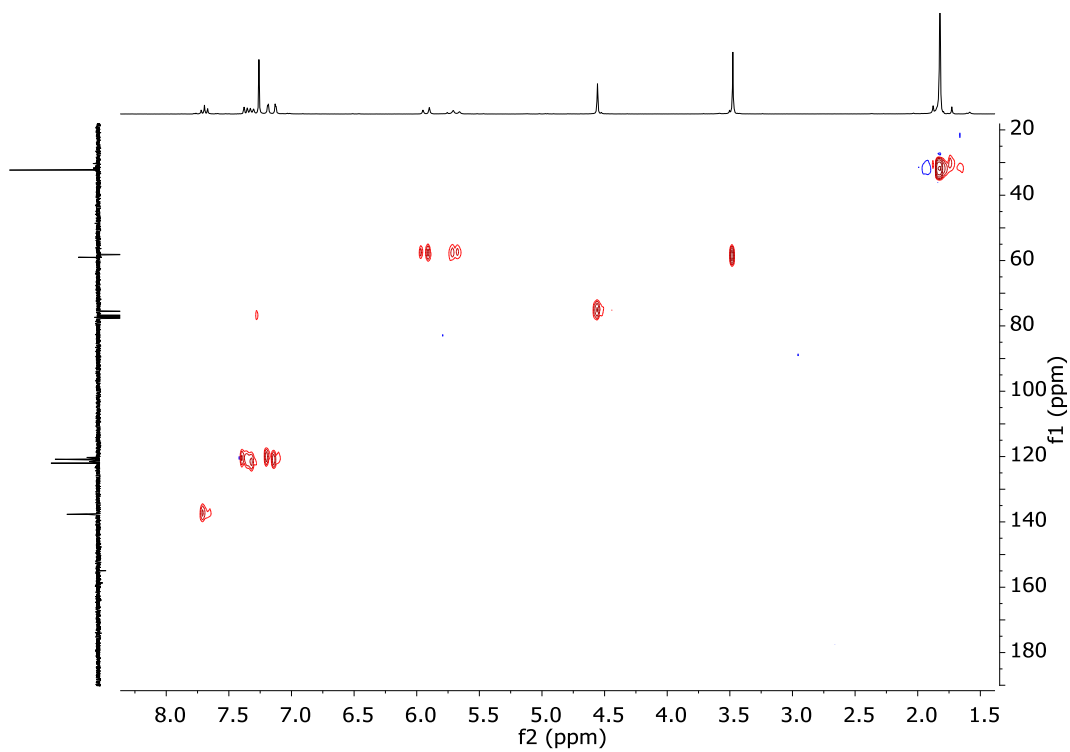

**Figure S16.**  $^1\text{H}\text{-}^{13}\text{C}$  HSQC NMR ( $\text{CDCl}_3$ ) of  $[\text{RhBr}(\text{CO})_2(\kappa\text{C-}^t\text{BuImCH}_2\text{PyCH}_2\text{OMe})]$  (**5**).

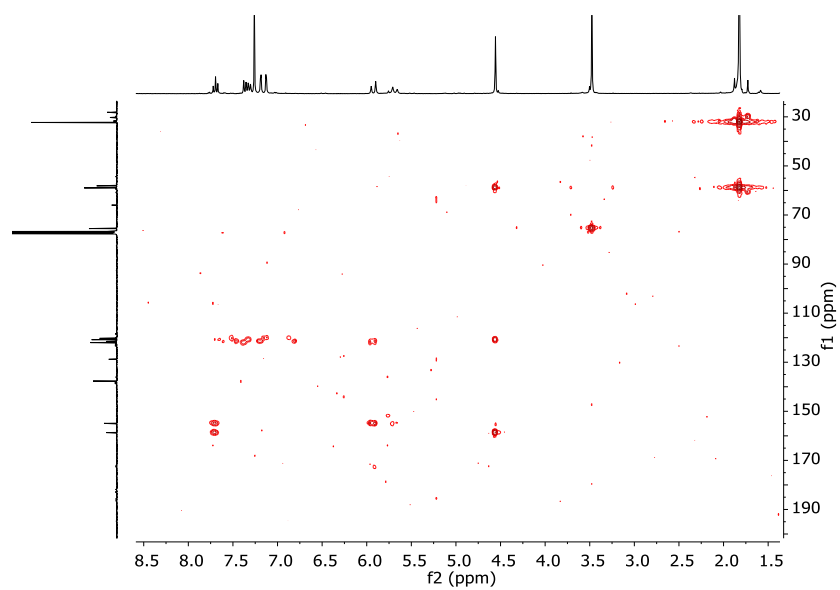

**Figure S17.**  $^1\text{H}$ - $^{13}\text{C}$  HMBC NMR ( $\text{CDCl}_3$ ) of  $[\text{RhBr}(\text{CO})_2(\kappa\text{C}^{\text{-}}\text{tBuImCH}_2\text{PyCH}_2\text{OMe})]$  (5).

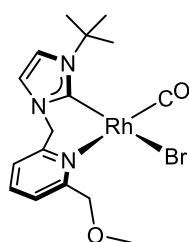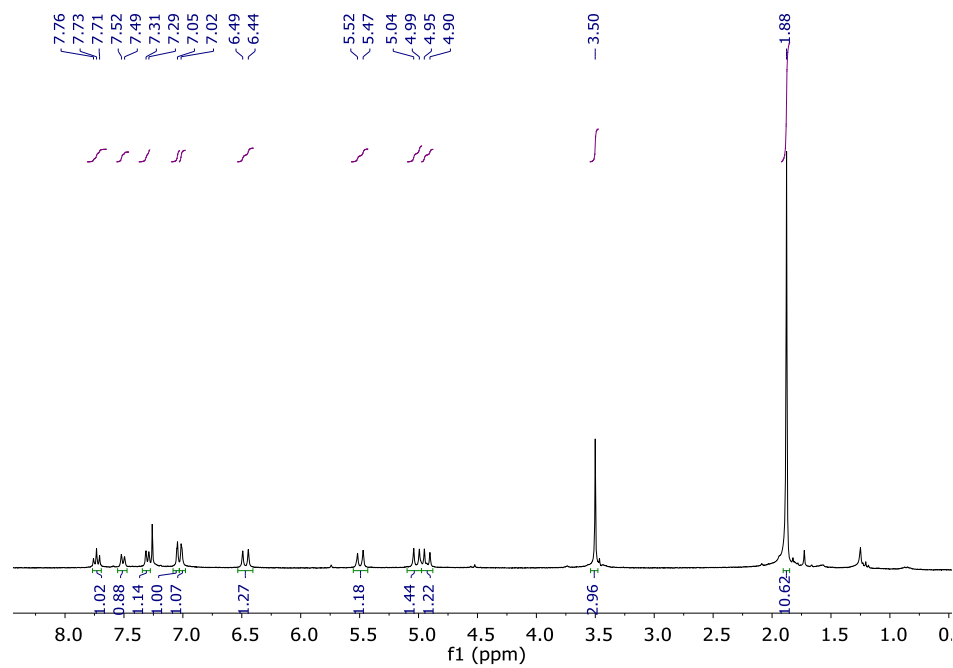

**Figure S18.**  $^1\text{H}$  NMR ( $\text{CDCl}_3$ ) spectrum of  $[\text{RhBr}(\text{CO})(\kappa^2\text{C},\text{N}^{\text{-}}\text{tBuImCH}_2\text{PyCH}_2\text{OMe})]$  (6).

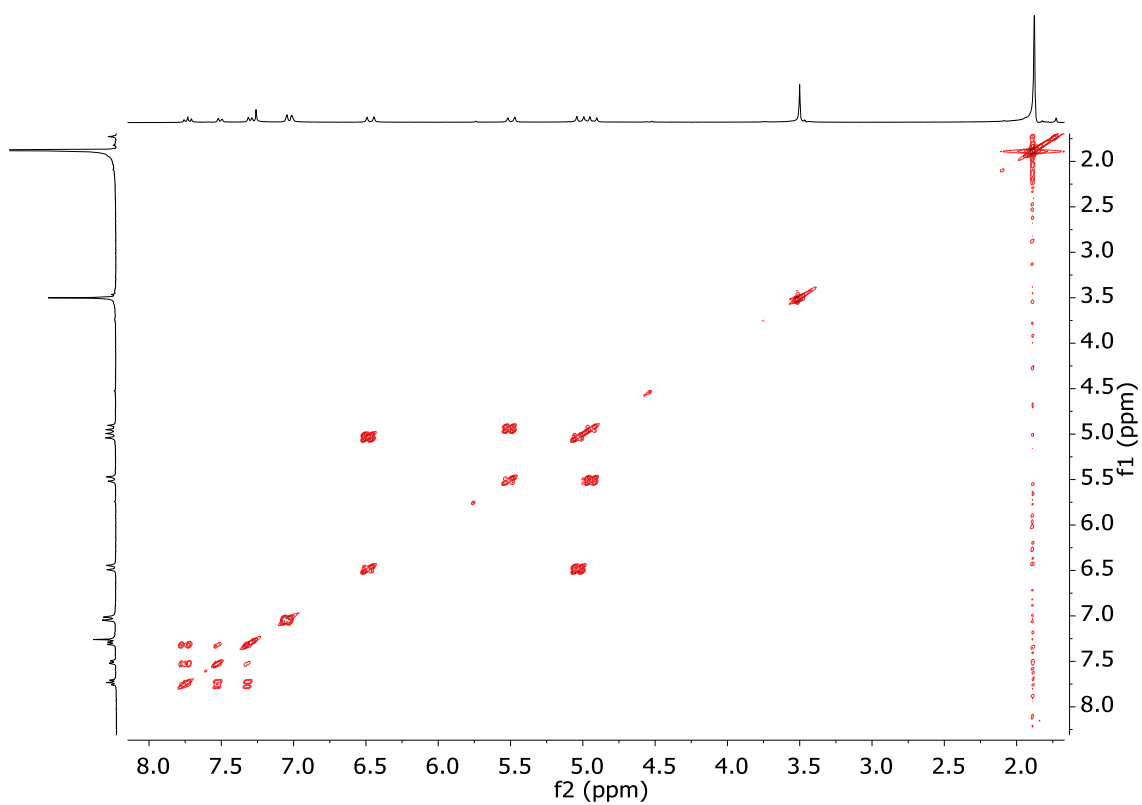

**Figure S19.**  $^1\text{H}$ - $^1\text{H}$  COSY NMR ( $\text{CDCl}_3$ ) of  $[\text{RhBr}(\text{CO})(\kappa^2\text{C},N\text{-}^t\text{BuImCH}_2\text{PyCH}_2\text{OMe})]$  (6).

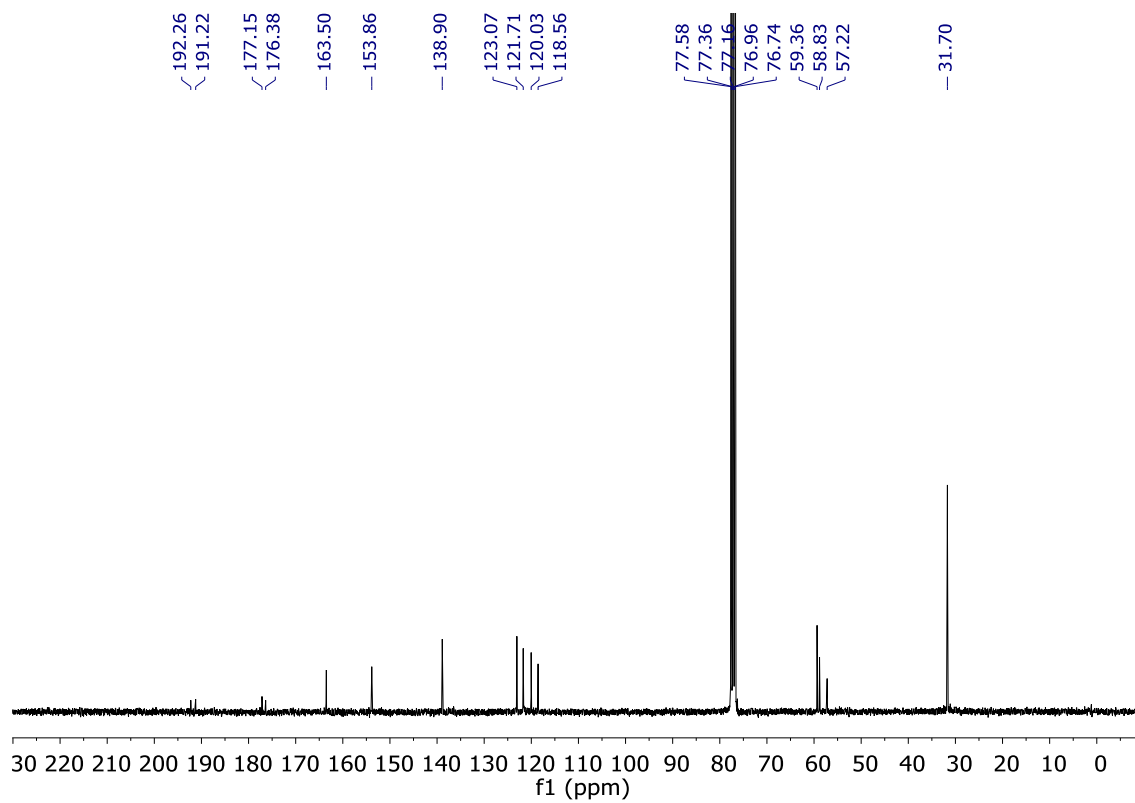

**Figure S20.**  $^{13}\text{C}\{^1\text{H}\}$  NMR ( $\text{CDCl}_3$ ) of  $[\text{RhBr}(\text{CO})(\kappa^2\text{C},N\text{-}^t\text{BuImCH}_2\text{PyCH}_2\text{OMe})]$  (6).

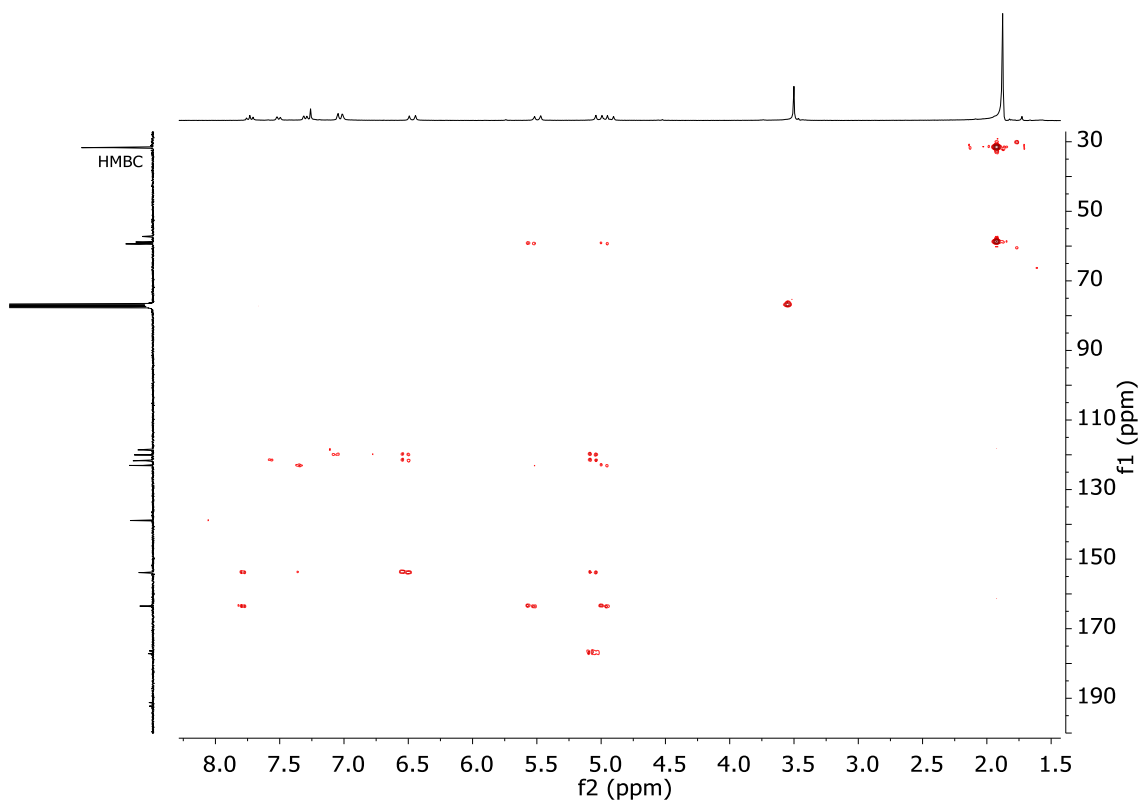

**Figure S21.**  $^1\text{H}$ - $^{13}\text{C}$  HMBC NMR ( $\text{CDCl}_3$ ) of  $[\text{RhBr}(\text{CO})(\kappa^2\text{C},N\text{-}^t\text{BuImCH}_2\text{PyCH}_2\text{OMe})]$  (6).

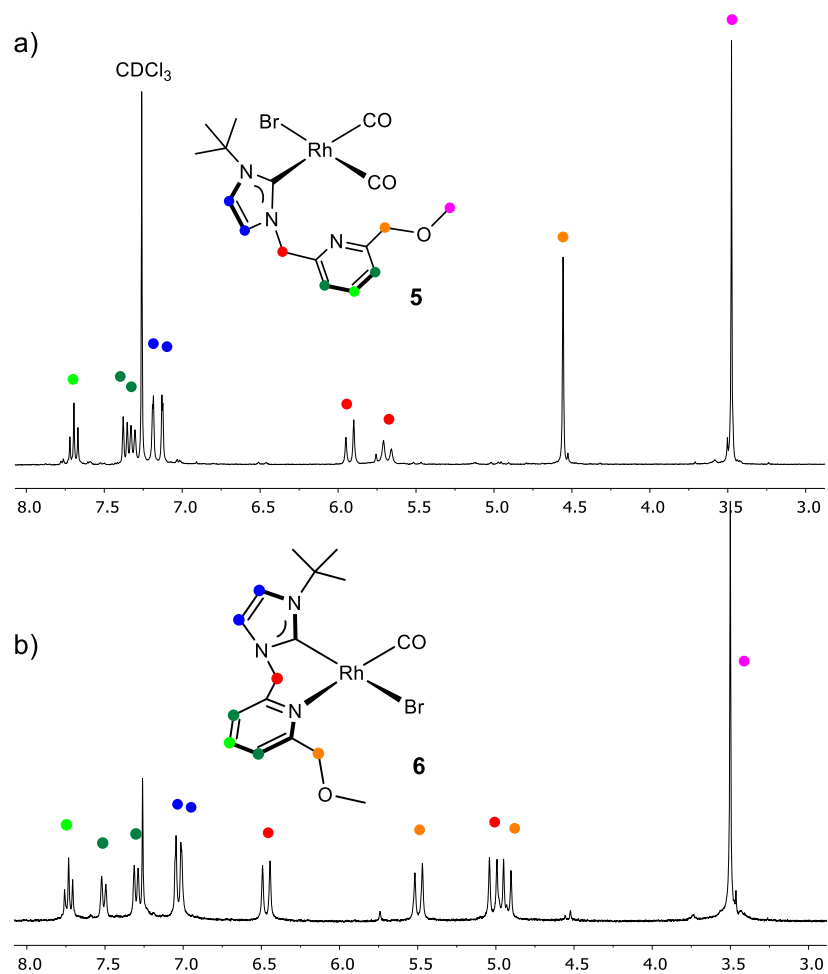

**Figure S22.** Comparison of the <sup>1</sup>H NMR spectra of complexes **5** and **6** in CDCl<sub>3</sub>.

## 2.- ATR-IR spectra of carbonyl compounds 4-6.

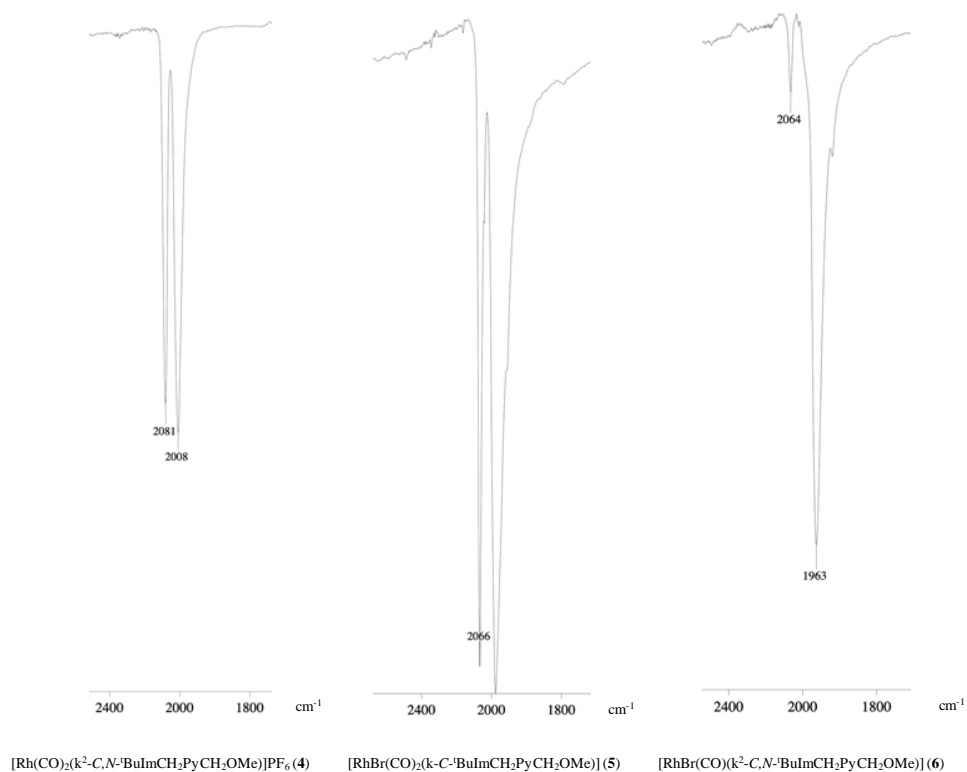

**Figure S23.** Terminal carbonyl region of the ATR-IR spectra of compounds 4-6 (ν(CO) in cm<sup>-1</sup>).

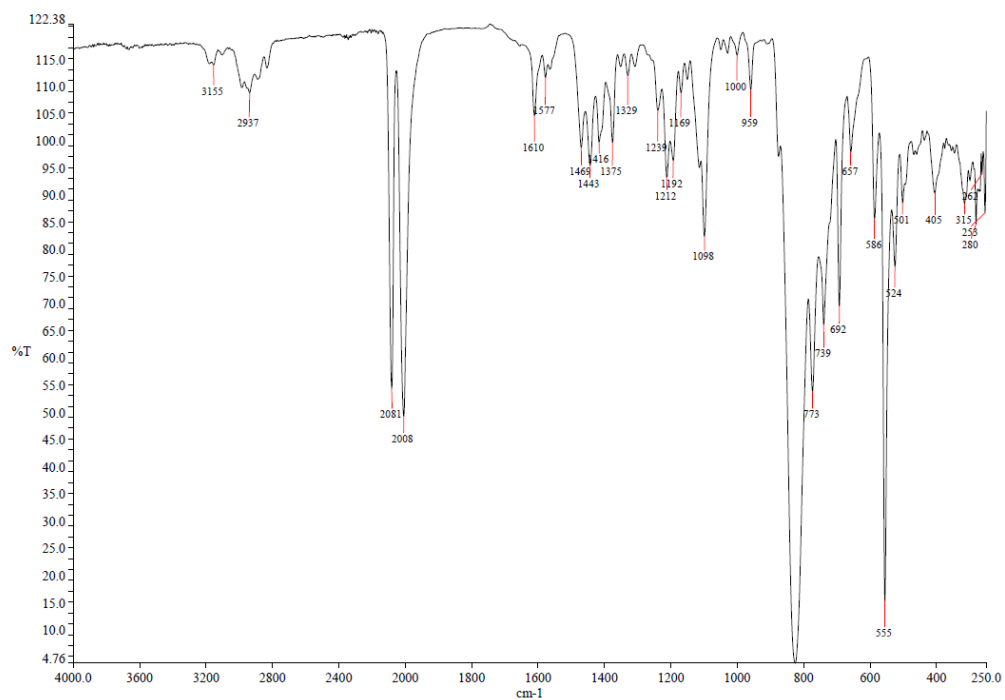

**Figure S24.** ATR-IR spectrum of [Rh(CO)<sub>2</sub>(κ<sup>2</sup>-C,N<sup>-i</sup>BuImCH<sub>2</sub>PyCH<sub>2</sub>OMe)]PF<sub>6</sub> (4).

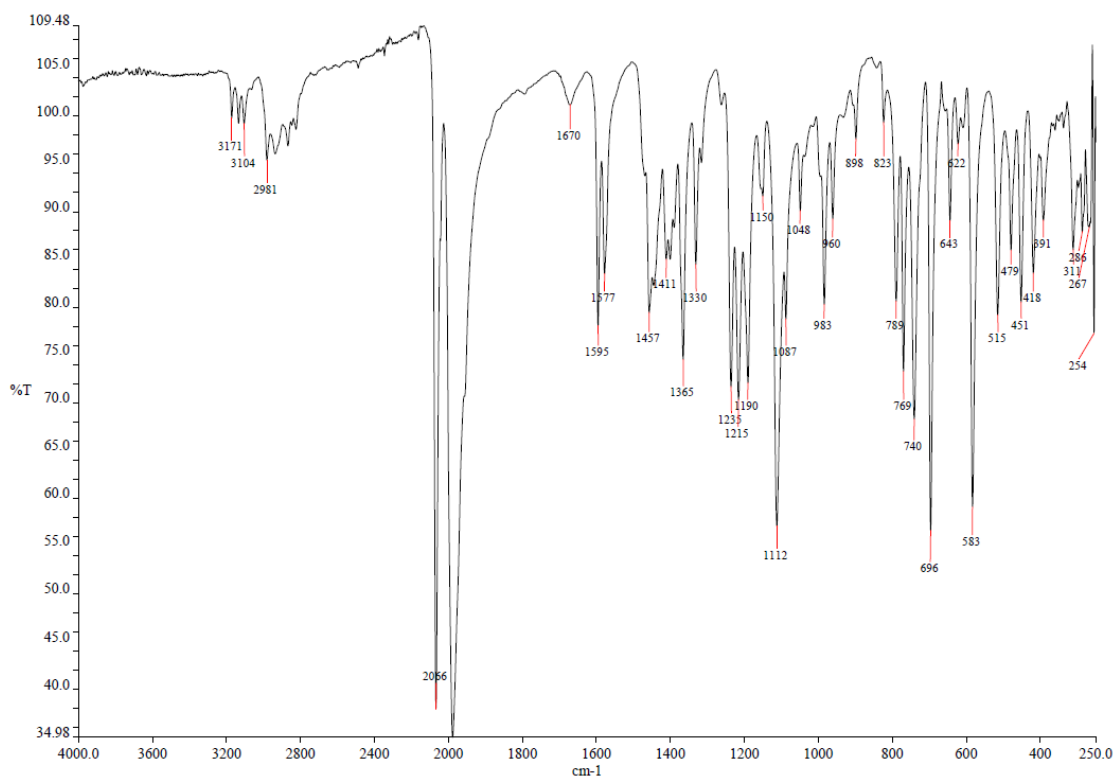

**Figure S25.** ATR-IR spectrum of [RhBr(CO)<sub>2</sub>(κC-<sup>1</sup>BuImCH<sub>2</sub>PyCH<sub>2</sub>OMe)] (5).

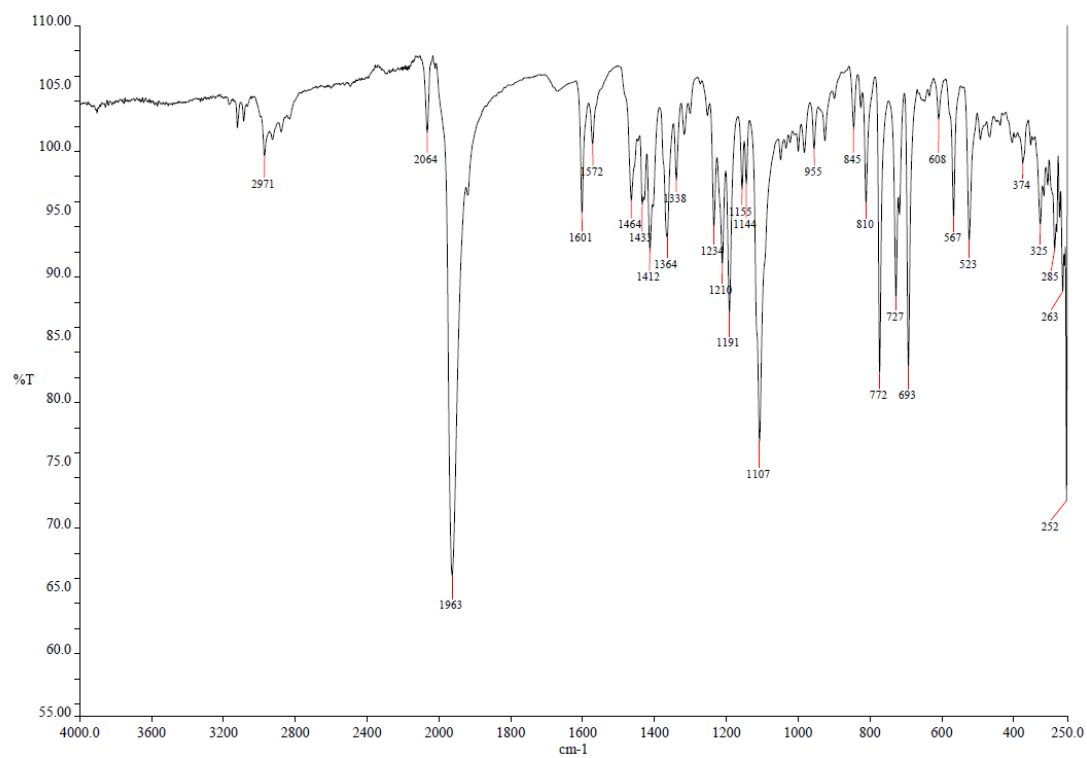

**Figure S26.** ATR-IR spectrum of [RhBr(CO)(κ<sup>2</sup>C,N-<sup>1</sup>BuImCH<sub>2</sub>PyCH<sub>2</sub>OMe)] (6).

### 3.- Hydrosilylation of phenylacetylene derivatives with HSiMe<sub>2</sub>Ph catalyzed by 6.

a)

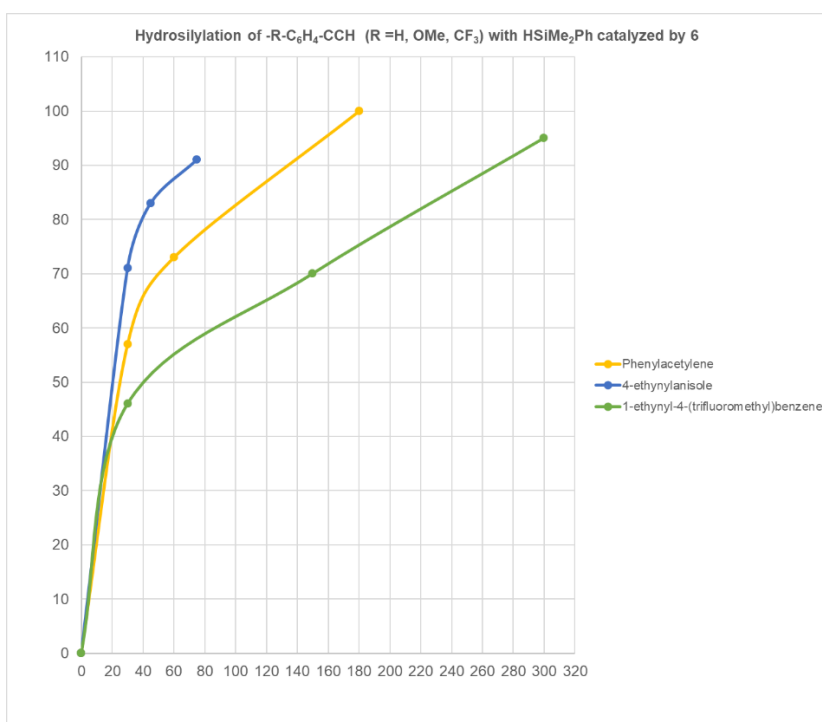

b)

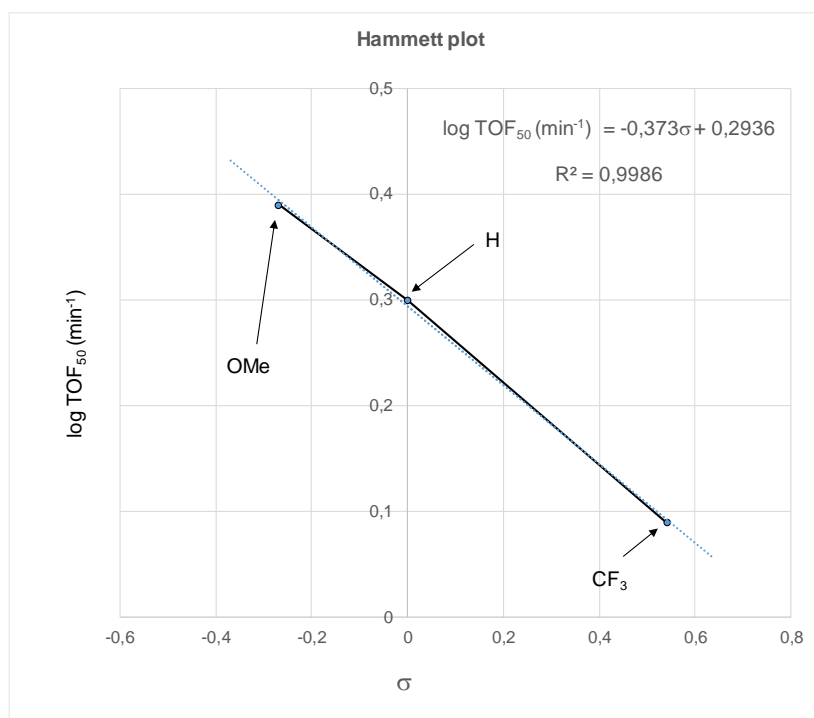

**Figure S27.** a) Reaction profile obtained from <sup>1</sup>H-NMR data for the hydrosilylation of phenylacetylene derivatives 4-R-C<sub>6</sub>H<sub>4</sub>-C≡CH (R = H, yellow; MeO, blue; and CF<sub>3</sub>, green) with HSiMe<sub>2</sub>Ph (1:1), in CDCl<sub>3</sub> (0.5 mL) at 333 K catalyzed by 6. b) Hammett plot.



**4.- Hydrosilylation of terminal alkynes with HSiMe<sub>2</sub>Ph catalyzed by 6 at different reaction times.<sup>a</sup>**

**Table S1.** Hydrosilylation of terminal alkynes catalyzed by **6**.

$$\text{R}-\text{C}\equiv\text{C}-\text{H} + \text{HSiMe}_2\text{Ph} \xrightarrow[\text{CDCl}_3, 333 \text{ K}]{\mathbf{6} (1 \text{ mol}\%)} \begin{matrix} \text{H} & \text{H} \\ | & | \\ \text{C} & = & \text{C} \\ | & & | \\ \text{R} & & \text{SiMe}_2\text{Ph} \end{matrix} + \begin{matrix} \text{R} & \text{H} \\ | & | \\ \text{C} & = & \text{C} \\ | & & | \\ \text{H} & & \text{SiMe}_2\text{Ph} \end{matrix} + \begin{matrix} \text{H} & \text{R} \\ | & | \\ \text{C} & = & \text{C} \\ | & & | \\ \text{H} & & \text{SiMe}_2\text{Ph} \end{matrix}$$
  
 $\beta\text{-(Z)} \qquad \qquad \beta\text{-(E)} \qquad \qquad \alpha$

|                 | Silane                | Alkyne               | Time   | Conversion (%) <sup>b</sup> | Selectividad (%) <sup>b</sup> |                    |          |
|-----------------|-----------------------|----------------------|--------|-----------------------------|-------------------------------|--------------------|----------|
|                 |                       |                      |        |                             | $\beta\text{-(Z)}$            | $\beta\text{-(E)}$ | $\alpha$ |
| 1               | HSiMe <sub>2</sub> Ph |                      | 10'    | 57                          | 92                            | 5                  | 3        |
| 2               |                       |                      | 20'    | 90                          | 92                            | 5                  | 3        |
| 3               |                       |                      | 30'    | 100                         | 90                            | 6                  | 4        |
| 4               | HSiMe <sub>2</sub> Ph |                      | 15'    | 95                          | 87                            | 7                  | 6        |
| 5               |                       |                      | 20'    | 100                         | 88                            | 6                  | 6        |
| 6               | HSiMe <sub>2</sub> Ph |                      | 30'    | 28                          | 2                             | 67                 | 31       |
| 7               |                       |                      | 6 h    | 92                          | 5                             | 55                 | 40       |
| 8 <sup>c</sup>  |                       |                      | 30'    | 64                          | -                             | 40                 | 47       |
| 9 <sup>c</sup>  | HSiMe <sub>2</sub> Ph |                      | 3 h    | 100                         | -                             | 44                 | 47       |
| 10              |                       |                      | 30'    | 57                          | 67                            | 21                 | 12       |
| 11              |                       |                      | 2 h    | 100                         | 67                            | 21                 | 12       |
| 12              | HSiMe <sub>2</sub> Ph |                      | 30'    | 71                          | 74                            | 17                 | 9        |
| 13              |                       |                      | 75'    | 91                          | 68                            | 24                 | 8        |
| 14 <sup>d</sup> | HSiMe <sub>2</sub> Ph |                      | 30'    | 46                          | 42                            | 35                 | 23       |
| 15 <sup>d</sup> |                       |                      | 5 h    | 95                          | 57                            | 26                 | 17       |
| 16              | HSiMe <sub>2</sub> Ph |                      | 24 h   | 23                          | 43                            | 49                 | 8        |
| 17              |                       |                      | 1h 30' | 33                          | 74                            | 15                 | 11       |
| 18              | HSiMe <sub>2</sub> Ph |                      | 6 h    | 96                          | 77                            | 15                 | 8        |
| 19              |                       | HSiMePh <sub>2</sub> |        | 10'                         | 49                            | 100                | -        |
| 20              | HSiMePh <sub>2</sub>  |                      | 30'    | 95                          | 100                           | -                  | -        |
| 21              |                       | HSiPh <sub>3</sub>   |        | 6 h                         | 30                            | 100                | -        |
| 22              | HSiEt <sub>3</sub>    |                      | 24 h   | 87                          | 100                           | -                  | -        |
| 23              |                       | HSiEt <sub>3</sub>   |        | 30'                         | 44                            | 86                 | 7        |
| 24              | HSiEt <sub>3</sub>    |                      | 1 h    | 65                          | 89                            | 6                  | 5        |

|    |                       |                                                                                   |      |     |    |    |    |
|----|-----------------------|-----------------------------------------------------------------------------------|------|-----|----|----|----|
| 25 |                       |                                                                                   | 90'  | 96  | 89 | 6  | 5  |
| 26 | HSiMe <sub>2</sub> Et | 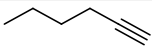 | 30'  | 98  | 89 | 7  | 4  |
| 27 | HSiMePh <sub>2</sub>  |  | 3 h  | 26  | 10 | 40 | 50 |
| 28 |                       |  | 24 h | 100 | 8  | 40 | 52 |
| 29 |                       |  | 3 h  | 22  | 29 | 42 | 29 |
| 30 |                       |  | 7 h  | 35  | 28 | 43 | 28 |
| 31 |                       |  | 24 h | 59  | 29 | 43 | 28 |
| 32 |                       |  | 3 h  | 24  | 16 | 55 | 29 |
| 33 |                       |  | 7 h  | 67  | 45 | 33 | 22 |
| 34 |                       |  | 24 h | 59  | 22 | 51 | 27 |
| 35 |                       |  | 3 h  | 33  | 44 | 34 | 22 |
| 36 |                       |  | 7 h  | 37  | 19 | 51 | 31 |
| 37 |                       |  | 24 h | 100 | 42 | 39 | 19 |

<sup>a</sup> Reaction conditions: alkyne (0.11 mmol), HSiMe<sub>2</sub>Ph (0.11 mmol) and **6** (0.0011 mmol, 1.0 mol%), in CDCl<sub>3</sub> (0.5 mL) at 333 K. [HSiMe<sub>2</sub>Ph] = [1-alkyne] ≈ 0.22 M. <sup>b</sup> Conversion, based on HSiR<sub>3</sub>, and selectivity determined by <sup>1</sup>H RMN using anisole as internal standard. <sup>c</sup> 13% and 9% of methylacrilate. <sup>d</sup> Traces of 1-trifluoromethyl-4-vinylbenzene were observed.

**5.- Isomerization  $\beta$ -(Z) $\rightarrow$  $\beta$ -(E) in the hydrosilylation of  $\text{PhC}\equiv\text{CH}$  with  $\text{HSiMe}_2\text{Ph}$  catalyzed by **6**.**

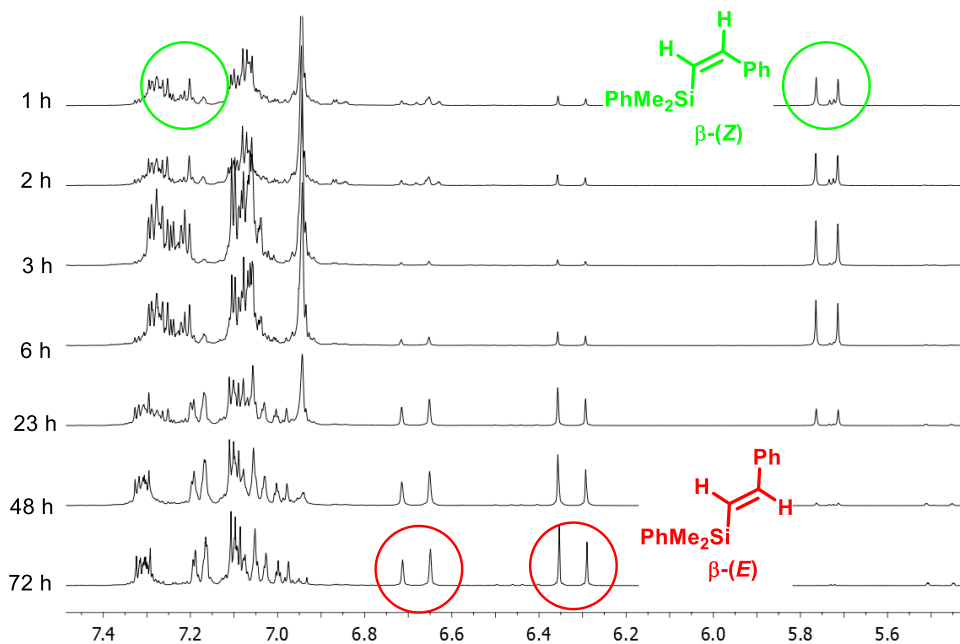

**Figure S28.**  $^1\text{H-NMR}$  ( $\text{CDCl}_3$ ) spectra of the hydrosilylation of  $\text{PhC}\equiv\text{CH}$  with  $\text{HSiMe}_2\text{Ph}$  catalyzed by **6** at long reaction times. Reaction conditions: phenylacetylene (0.11 mmol),  $\text{HSiMe}_2\text{Ph}$  (0.11 mmol) and **6** (0.0011 mmol, 1 mol%) in  $\text{CDCl}_3$  (0.5 mL) at 333 K.

**6.- Reaction of **6** with 20 eq. of  $\text{HSi}(\text{OEt})_3$**

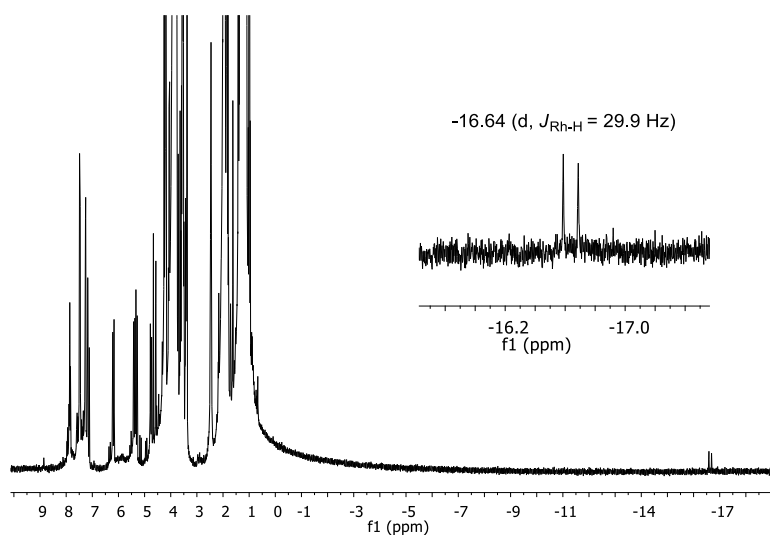

**Figure S29.**  $^1\text{H-NMR}$  (acetonitrile- $d_3$ , 300K) of the reaction of  $[\text{RhBr}(\text{CO})(\text{k}^2\text{-C,N-}^t\text{BuImCH}_2\text{PyCH}_2\text{OMe})]$  (**6**) with 20 eq. of  $\text{HSi}(\text{OEt})_3$  at 333K for 1h.

7.- Determination of activation parameters for the hydrosilylation of 1-hexyne with HSiMe<sub>2</sub>Ph catalyzed by **6** in CDCl<sub>3</sub>.

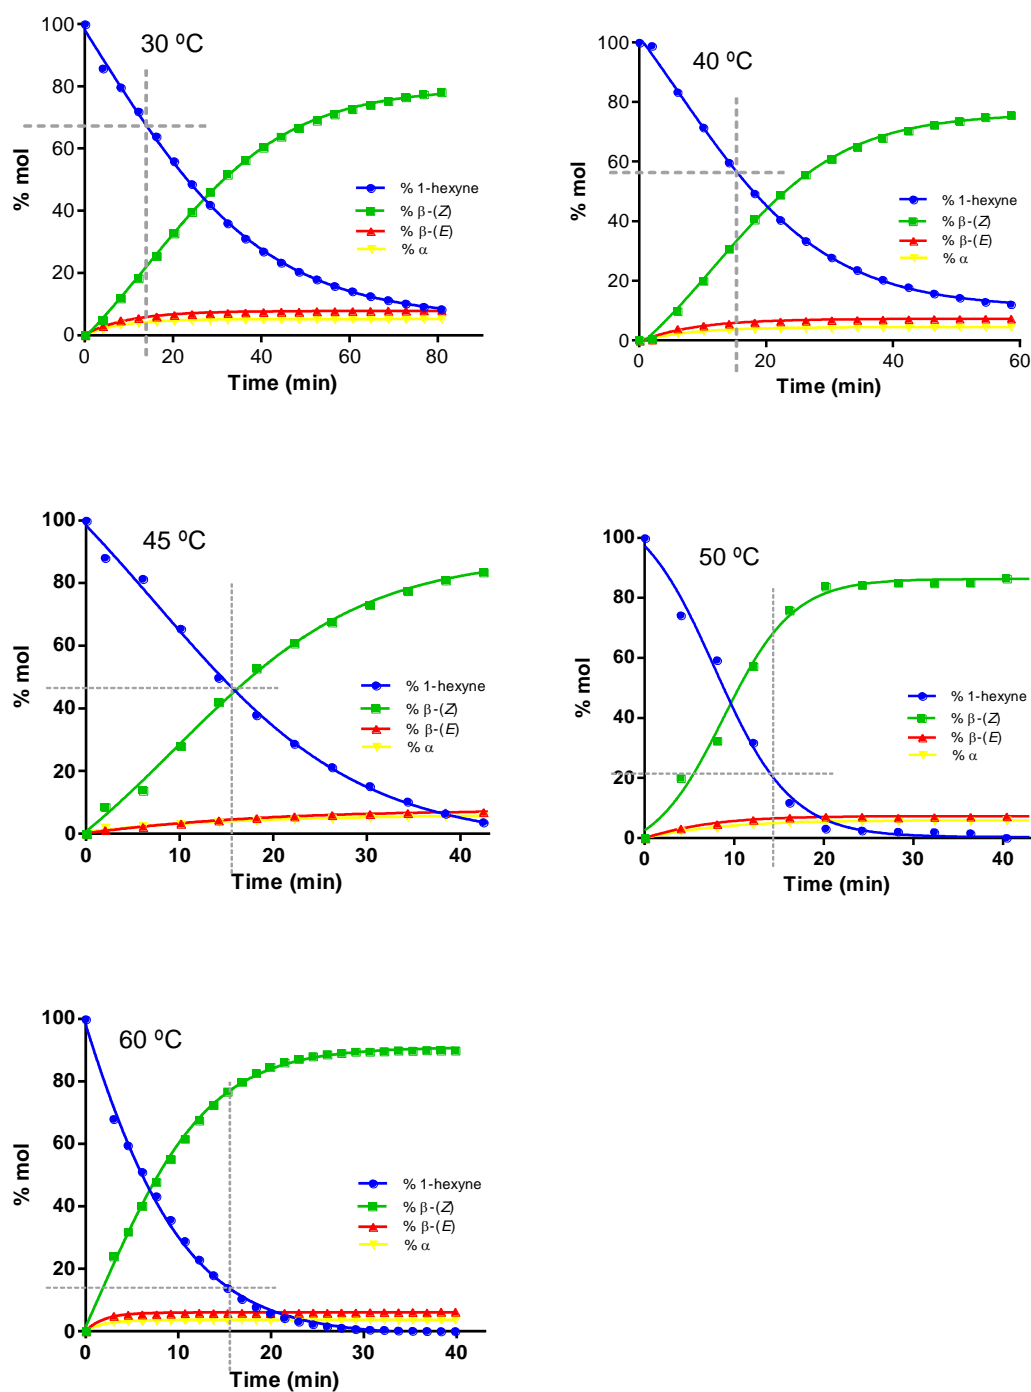

**Figure S30.** Reaction profiles for the hydrosilylation of 1-hexyne with HSiMe<sub>2</sub>Ph monitored by <sup>1</sup>H NMR at the indicated temperature. Reaction conditions: hydrosilane (0.11 mmol), alkyne (0.11 mmol) and **6** (1 mol%) in CDCl<sub>3</sub> (0.5 mL).

**Table S2.** Influence of the temperature in the hydrosilylation of 1-hexyne to  $\beta$ -(Z)-hex-1-enyldimethyl(phenyl)silane catalyzed by **6**.<sup>a,b</sup>

Reaction scheme:  $C_4H_9-C\equiv C-H + HSiMe_2Ph \xrightarrow[CDCl_3, T]{6} \beta\text{-(Z)} + \beta\text{-(E)} + \alpha$

|    | T (K) | t (min) | Conversion (%) <sup>b</sup> | Selectivity (%) <sup>b</sup> |              |          |
|----|-------|---------|-----------------------------|------------------------------|--------------|----------|
|    |       |         |                             | $\beta$ -(Z)                 | $\beta$ -(E) | $\alpha$ |
| 1  | 303   | 15      | 34                          | 71                           | 17           | 12       |
| 2  |       | 81      | 92                          | 87                           | 8            | 5        |
| 3  | 313   | 15      | 43                          | 77                           | 14           | 9        |
| 4  |       | 58      | 88                          | 86                           | 8            | 6        |
| 5  | 318   | 15      | 53                          | 85                           | 8            | 7        |
| 6  |       | 50      | 100                         | 87                           | 7            | 6        |
| 7  | 323   | 15      | 77                          | 84                           | 9            | 7        |
| 8  |       | 44      | 100                         | 87                           | 7            | 6        |
| 9  | 333   | 15      | 86                          | 89                           | 7            | 4        |
| 10 |       | 30      | 100                         | 90                           | 6            | 4        |

<sup>a</sup> Reaction conditions: 1-hexyne (0.10 mmol), HSiMe<sub>2</sub>Ph (0.10 mmol) and **6** (0.001 mmol, 1.0 mol%), in CDCl<sub>3</sub> (0.5 mL). <sup>b</sup> Conversion, based on HSiMe<sub>2</sub>Ph, and selectivity determined by <sup>1</sup>H NMR.

The Gibbs free energy barrier ( $\Delta G^\ddagger$ ) and the activation parameters,  $\Delta H^\ddagger$  and  $\Delta S^\ddagger$ , were determined from a linear least squares fit of the temperature dependence of the initial turnover frequency determined at 15 min reaction time, TOF<sub>0</sub> (s<sup>-1</sup>), to the logarithmic form of the Eyring equation.

Free energy equation:

$$\Delta G^\ddagger = \Delta H^\ddagger - T\Delta S^\ddagger$$

Eyring equation:

$$k = K \frac{k_b T}{h} e^{\frac{-\Delta G^\ddagger}{RT}} \quad K = 1$$

$$\ln\left(\frac{k}{T}\right) = -\frac{\Delta H^\ddagger}{R} \cdot \frac{1}{T} + \ln\left(\frac{k_b}{h}\right) + \frac{\Delta S^\ddagger}{R}$$

where  $T$  is temperature in Kelvin,  $k_b$  is the Boltzmann's constant and  $h$  is Planck's constant.

| T   | 1/T      | k (s <sup>-1</sup> ) | ln (k/T)  |
|-----|----------|----------------------|-----------|
| 303 | 0,003299 | 0,026667             | -9,338074 |
| 313 | 0,003193 | 0,036667             | -9,052090 |
| 318 | 0,003143 | 0,050000             | -8,757784 |
| 323 | 0,003095 | 0,072222             | -8,405660 |
| 333 | 0,003002 | 0,085556             | -8,266732 |

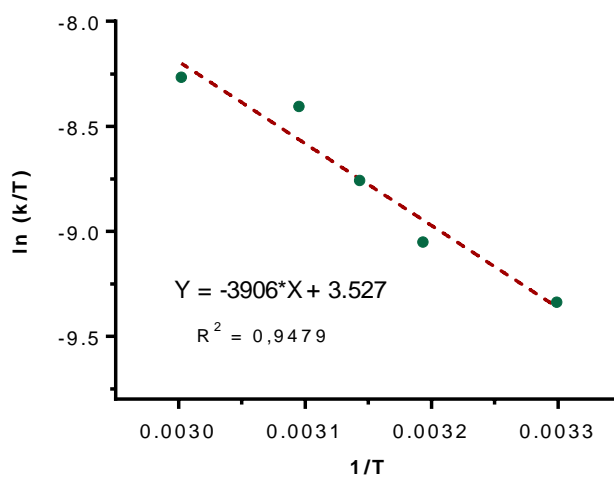

**Figure S31.** Eyring plot for the hydrosilylation of 1-hexyne with HSiMe<sub>2</sub>Ph catalyzed by **6** in CDCl<sub>3</sub>. The line represents the least squares fit to the data point.

Slope: -3906    Intercept: 3.53    R<sup>2</sup>: 0.9479;

$\Delta H^\ddagger$  (kcal mol<sup>-1</sup>): 7.8 ± 1.0;  $\Delta S^\ddagger$  (J/K·mol): -40.2 ± 3.3

$\Delta G^\ddagger$  (kJ mol<sup>-1</sup>): 19.8 ± 2.0 at 298 K

8.- Scan of the Si···O coordinates en route from II → III.

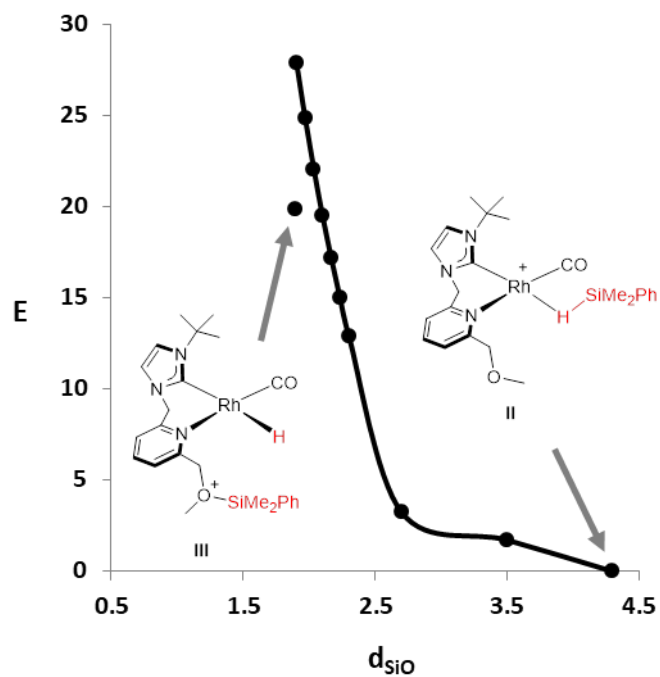

**Figure S32.** Energy (E, kcal·mol<sup>-1</sup>) vs. Si···O distance (d<sub>SiO</sub>, Å) for II → III (B97D3, def2svp, CPCM/CHCl<sub>3</sub>, 298 K, 1 atm).
